# Supplementary material for: One-Step Purification of Microbially Produced Hydrophobic Terpenes via Process Chromatography
Source: Front Bioeng Biotechnol. 2019 Jul 29;7:185. doi: 10.3389/fbioe.2019.00185 (PMC6681792; doi:10.3389/fbioe.2019.00185)
Supplement: Supplementary file 2 [file Data_Sheet_1.xlsx]

## Sheet: Data sheet1
	Data Sheet 1	Values for the porosities and hetp values
		Porosities
	column	interstitial/extraparticle porosity (void fraction) ε	intraparticel porosity ε_p	total porosity ε_t	HETP [µm]	reduced HETP
	Bio-Beads SM-2	0.692741	0.0935444	0.721483	66887.6	1114.79
	Bio-Beads S-X12	0.326397	0.179489	0.447301	1.55696e+06	2594.94
	Polygoprep C18	0.666697	0.699973	0.9	925.199	7.11691
	Rensa PY	0.650474	0.713899	0.9	2181.02	21.8102
	Rensa RP	0.464491	0.629411	0.801546	221.082	4.42165
	Silica gel 60	0.677204	0.602756	0.871771	4212.09	84.2418
	XAD-2	0.499482	0.39419	0.696781	70509.8	141.02
	XAD-7	0.548647	0.556888	0.8	97227.8	194.456
